# Supplementary material for: Path-memory induced quantization of classical orbits
Source: HighWire-hosted journal article supplement (doi:10.1073/pnas.1007386107), 2010-09-20
Supplement: pnas.1007386107_SI.pdf [file pnas.1007386107_SI.pdf]

# Supporting Information

Fort et al. 10.1073/pnas.1007386107

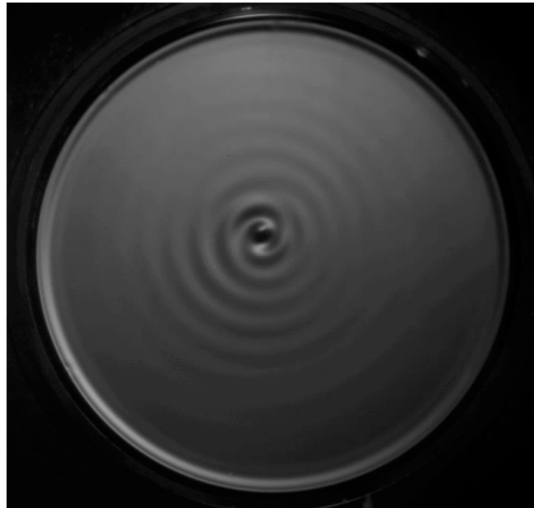

**Movie S1.** The orbiting walker as observed in real time for a walker of speed  $V_w = 13.5 \pm 0.1$  mm/s on a bath rotating clockwise  $\Omega = 1.4$  Rd/s. The orbiting is counterclockwise and the orbit corresponds to  $n = 0$ .

[Movie S1 \(MOV\)](#)

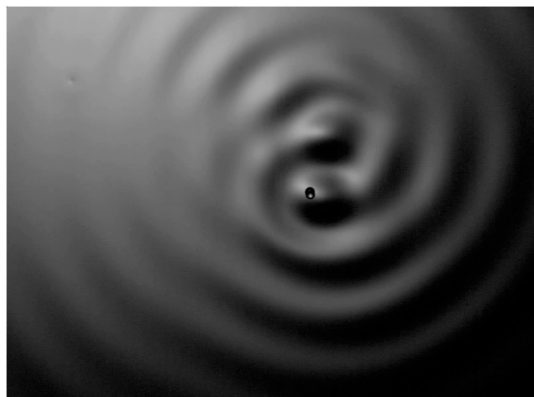

**Movie S2.** A slow motion of the orbiting walker obtained with a fast camera (1,000 im/s) displayed at 10 im/s. The orbit corresponds to the mode  $n = 1$ .

[Movie S2 \(MOV\)](#)
